# Supplementary material for: Cat–Owner Relationship and Cat Behaviour: Effects of the COVID-19 Confinement and Implications for Feline Management
Source: MDPI journal article supplement (doi:10.3390/vetsci9070369), 2022-07-18
Supplement: s1 [file s1]

**Annex S1: complete questionnaire translated from Italian into English**  
**Pets during the COVID confinement**

---

**1) If you currently live in Italy and agree to participate in this study, please mark the “Yes” option.\***

☐ Yes

☐ No

---

**General information**

**2) What age group do you belong to?\***

☐ Under 18 yoa

☐ 18-25 yoa

☐ 26-35 yoa

☐ 36-45 yoa

☐ 46-55 yoa

☐ 56-65 yoa

☐ 66-75 yoa

☐ 76+ yoa

**3) What is your gender?\***

☐ Male

☐ Female

☐ Other

**4) Education level?**

☐ Middle

☐ High

☐ Graduate

☐ Post-graduate

☐ Other

**5) What is your employment?**

☐ I work with animals (Veterinarian, dog trainer, etc...)

☐ Freelancer

☐ Student

☐ Labourer

☐ Retired

☐ Stay-at-home

☐ Other

**6) How many people live in the household at this time? (If there is none in one or more categories, don't forget to select "none").\***

|                                               | None                     | 1                        | 2                        | 3                        | 4                        | 5                        | 6 or more                |
|-----------------------------------------------|--------------------------|--------------------------|--------------------------|--------------------------|--------------------------|--------------------------|--------------------------|
| Number of children aged 5 years old or under? | <input type="checkbox"/> |
| Number of children aged 6 to 12 years old?    | <input type="checkbox"/> |
| Number of children aged 13 to 17 years old?   | <input type="checkbox"/> |
| Number of adults aged 18 to 64 years old?     | <input type="checkbox"/> |
| Number of adults aged 65 years or older?      | <input type="checkbox"/> |

**7) What is your role in the household? (Please choose the option that most applies)\***

☐ Child

☐ Parent

☐ Grandparent

☐ Adult without children

☐ Other

**8) How many dogs and/or cats live in your household?\***

|      | None                     | 1                        | 2                        | 3                        | 4                        | 5                        | 6 or more                |
|------|--------------------------|--------------------------|--------------------------|--------------------------|--------------------------|--------------------------|--------------------------|
| Dogs | <input type="checkbox"/> |
| Cats | <input type="checkbox"/> |

**9) What type of home do you live in?\***

☐ A house

☐ A flat or apartment

**10) Does your home have any outdoor space (please tick all that apply)\***

☐ No

- ☐ Yes, it has a common outdoor place
- ☐ Yes, it has an outdoor terrace
- ☐ Yes, it has a garden/private yard
- ☐ Yes, it has a balcony

**11) Please indicate the zip code of the place where you live**

12) How big is your home?\*

- ( ) Large  
( ) Medium sized  
( ) Small

13) How do you rate your family's total income?

- ☐ Low
- ☐ Medium
- ☐ High

14) The official confinement applies differently to people. For example, some people are authorised to leave home to work. Please select the option that best describes your household situation

- ☐ We are all confined and none of us work from home.
- ☐ We are all confined and some of us work from home
- ☐ We are all confined and we all work from home
- ☐ Some of us are confined, and some of us have permission to go out to work
- ☐ We all have permission to go out to work

15) How many weeks have you been confined at home since the official announcement of movement restrictions?\*

- ☐ 1 week
- ☐ 2 weeks
- ☐ 3 weeks
- ☐ 4 weeks
- ☐ 5 weeks
- ☐ 6 weeks
- ☐ 7 weeks
- ☐ 8 weeks
- ☐ 9 weeks
- ☐ 10 weeks
- ☐ 11 weeks

**16) What negative impact has the official confinement had on your household?\***

|                  | A lot | Quite a lot | Somewhat | Little | Very little | None |
|------------------|-------|-------------|----------|--------|-------------|------|
| Financial impact | ( )   | ( )         | ( )      | ( )    | ( )         | ( )  |
| Emotional impact | ( )   | ( )         | ( )      | ( )    | ( )         | ( )  |

|                  |                       |                       |                       |                       |                       |                       |
|------------------|-----------------------|-----------------------|-----------------------|-----------------------|-----------------------|-----------------------|
| Health impact    | <input type="radio"/> |
| Lifestyle impact | <input type="radio"/> |

**17) To what extent has confinement affected your quality of life?\***

- ☐ It is much better
  - ☐ It is moderately better
  - ☐ It is slightly better
  - ☐ It is no different
  - ☐ It is slightly worse
  - ☐ It is moderately worse
  - ☐ It is much worse
- 

**Questions about one of your pets**

If you own more than one cat, please answer for the one whose name is first in alphabetical order.

**18) What is the age of your cat in years?**

- ☐ less than 1 year
- ☐ 1 year
- ☐ 2 years
- ☐ 3 years
- ☐ 4 years
- ☐ 5 years
- ☐ 6 years
- ☐ 7 years
- ☐ 8 years
- ☐ 9 years
- ☐ 10 years
- ☐ 11 years
- ☐ 12 years
- ☐ 13 years
- ☐ 14 years

**19) What is the sex of your cat?**

- ☐ Male neutered
- ☐ Male not-neutered
- ☐ Female neutered
- ☐ Female not-neutered

**20) Caring for my cat is:\***

- ☐ Much more difficult than before the confinement
- ☐ More difficult than before the confinement
- ☐ Neither harder nor easier than before the confinement
- ☐ Easier than before the confinement
- ☐ Much easier than before the confinement

**21) My cat gives me a reason to get up in the morning.\***

- ☐ Much more than before the confinement
- ☐ More than before the confinement
- ☐ No more or less than before the confinement
- ☐ Less than before the confinement
- ☐ Much less than before the confinement

**22) How oft\*en do you kiss your cat?\***

☐ Much more than before the confinement      ☐ More than before the confinement      ☐ No more or less than before the confinement      ☐ Less than before the confinement      ☐ Much less than before the confinement

**23) There are major aspects of owning a cat I don't like.\***

☐ Much more than before the confinement      ☐ More than before the confinement      ☐ No more or less than before the confinement      ☐ Less than before the confinement      ☐ Much less than before the confinement

**24) I wish my cat and I never had to be apart.\***

☐ Much more than before the confinement      ☐ More than before the confinement      ☐ No more or less than before the confinement      ☐ Less than before the confinement      ☐ Much less than before the confinement

**25) I feel that my cat makes too much mess.\***

☐ Much more than before the confinement      ☐ More than before the confinement      ☐ No more or less than before the confinement      ☐ Less than before the confinement      ☐ Much less than before the confinement

**26) How oft\*en do you play games with your cat?\***

☐ Much more than before the confinement      ☐ More than before the confinement      ☐ No more or less than before the confinement      ☐ Less than before the confinement      ☐ Much less than before the confinement

**27) It bothers me that my cat stops me doing things I enjoyed before I owned it.\***

☐ Much more than before the confinement      ☐ More than before the confinement      ☐ No more or less than before the confinement      ☐ Less than before the confinement      ☐ Much less than before the confinement

**28) How oft\*en do you spend \*me enjoying watching your cat?\***

☐ Much more than before the confinement      ☐ More than before the confinement      ☐ No more or less than before the confinement      ☐ Less than before the confinement      ☐ Much less than before the confinement

**29) It is annoying that sometimes I have to change my plans because of my cat.\***

☐ Much more than before the confinement      ☐ More than before the confinement      ☐ No more or less than before the confinement      ☐ Less than before the confinement      ☐ Much less than before the confinement

**30) My cat costs too much money.\***

☐ Much more than before the confinement      ☐ More than before the confinement      ☐ No more or less than before the confinement      ☐ Less than before the confinement      ☐ Much less than before the confinement

**31) My cat is constantly attenti\*ve to me.\***

☐ Much more than before the confinement      ☐ More than before the confinement      ☐ No more or less than before the confinement      ☐ Less than before the confinement      ☐ Much less than before the confinement

**32) How often do you give your cat food treats?\***

☐ Much more than before the confinement      ☐ More than before the confinement      ☐ No more or less than before the confinement      ☐ Less than before the confinement      ☐ Much less than before the confinement

**33) How often do you tell your cat things you don't tell anyone else?\***

☐ Much more than before the confinement      ☐ More than before the confinement      ☐ No more or less than before the confinement      ☐ Less than before the confinement      ☐ Much less than before the confinement

**34) How often do you feel that looking after your cat is a chore?\***

☐ Much more than before the confinement      ☐ More than before the confinement      ☐ No more or less than before the confinement      ☐ Less than before the confinement      ☐ Much less than before the confinement

**35) How often do you talk to your cat?\***

☐ Much more than before the confinement      ☐ More than before the confinement      ☐ No more or less than before the confinement      ☐ Less than before the confinement      ☐ Much less than before the confinement

**36) How often does your cat stop you doing things you want to?\***

☐ Much more than before the confinement      ☐ More than before the confinement      ☐ No more or less than before the confinement      ☐ Less than before the confinement      ☐ Much less than before the confinement

**37) I would like to have my cat near me all the time.\***

☐ Much more than before the confinement      ☐ More than before the confinement      ☐ No more or less than before the confinement      ☐ Less than before the confinement      ☐ Much less than before the confinement

**38) How often do you groom your cat?\***

☐ Much more than before the confinement      ☐ More than before the confinement      ☐ No more or less than before the confinement      ☐ Less than before the confinement      ☐ Much less than before the confinement

**39) If everyone else left\* me, my cat would still be there for me.\***

☐ Much more than before the confinement      ☐ More than before the confinement      ☐ No more or less than before the confinement      ☐ Less than before the confinement      ☐ Much less than before the confinement

**40) How often do you feel that having a cat is more trouble than it's worth?\***

☐ Much more than before the confinement      ☐ More than before the confinement      ☐ No more or less than before the confinement      ☐ Less than before the confinement      ☐ Much less than before the confinement

**41) My cat helps me get through tough times.\***

☐ Much more than before the confinement      ☐ More than before the confinement      ☐ No more or less than before the confinement      ☐ Less than before the confinement      ☐ Much less than before the confinement

**42) How often do you cuddle your cat?\***

☐ Much more than before the confinement      ☐ More than before the confinement      ☐ No more or less than before the confinement      ☐ Less than before the confinement      ☐ Much less than before the confinement

**43) My cat provides me with constant companionship.\***

☐ Much more than before the confinement      ☐ More than before the confinement      ☐ No more or less than before the confinement      ☐ Less than before the confinement      ☐ Much less than before the confinement

**44) How often do you have your cat with you while relaxing, i.e. watching TV?\***

☐ Much more than before the confinement      ☐ More than before the confinement      ☐ No more or less than before the confinement      ☐ Less than before the confinement      ☐ Much less than before the confinement

**45) My cat is there whenever I need to be comforted.\***

☐ Much more than before the confinement      ☐ More than before the confinement      ☐ No more or less than before the confinement      ☐ Less than before the confinement      ☐ Much less than before the confinement

**46) How often do you pet your cat?\***

☐ Much more than before the confinement      ☐ More than before the confinement      ☐ No more or less than before the confinement      ☐ Less than before the confinement      ☐ Much less than before the confinement

**47) How often do you buy your cat presents?\***

☐ Much more than before the confinement      ☐ More than before the confinement      ☐ No more or less than before the confinement      ☐ Less than before the confinement      ☐ Much less than before the confinement

**48) To what extent do you think the confinement period has affected your cat's quality of life?\***

☐ It's much better  
☐ It's moderately better  
☐ It's slightly better  
☐ It's no different  
☐ It's slightly worse  
☐ It's moderately worse  
☐ It's much worse

**49) How has the confinement period affected your relationship with your cat?\***

☐ It's much better  
☐ It's moderately better  
☐ It's slightly better  
☐ It's no different  
☐ It's slightly worse  
☐ It's moderately worse  
☐ It's much worse

**50) Do you feel that your cat helps you to better go through the period of isolation?**

☐ Very much  
☐ A lot  
☐ Enough  
☐ Neither yes nor no

- ☐ A little bit
- ☐ Little
- ☐ Very Little

**51) Recently, how often have you been mad at your cat?\***

- ☐ Much more than before isolation
- ☐ Moderately more than before isolation
- ☐ Slightly more than before the confinement
- ☐ No more and no less than before the isolation
- ☐ Slightly less than before the isolation
- ☐ Moderately less than before the confinement
- ☐ Much less than before the confinement

**52) The following problematic behaviours are relatively common in cats. Please indicate how you have observed them in your cat.\***

|                                                              | <b>My cat never did this</b> | <b>The same as before the confinement</b> | <b>It improved during the confinement</b> | <b>It got worse during the confinement</b> |
|--------------------------------------------------------------|------------------------------|-------------------------------------------|-------------------------------------------|--------------------------------------------|
| Aggression towards family members (hissing, scratching etc.) | <input type="radio"/>        | <input type="radio"/>                     | <input type="radio"/>                     | <input type="radio"/>                      |
| Aggressiveness towards other cats living in the house        | <input type="radio"/>        | <input type="radio"/>                     | <input type="radio"/>                     | <input type="radio"/>                      |
| Aggression towards people who do not live in the house       | <input type="radio"/>        | <input type="radio"/>                     | <input type="radio"/>                     | <input type="radio"/>                      |
| Aggression towards other cats outside the house              | <input type="radio"/>        | <input type="radio"/>                     | <input type="radio"/>                     | <input type="radio"/>                      |
| Urination/defecation inside the house outside the litterbox  | <input type="radio"/>        | <input type="radio"/>                     | <input type="radio"/>                     | <input type="radio"/>                      |
| Fear of loud or unexpected noises                            | <input type="radio"/>        | <input type="radio"/>                     | <input type="radio"/>                     | <input type="radio"/>                      |
| Destructiveness (e.g. scratching furniture)                  | <input type="radio"/>        | <input type="radio"/>                     | <input type="radio"/>                     | <input type="radio"/>                      |
| Hiding and avoiding in contact with people                   | <input type="radio"/>        | <input type="radio"/>                     | <input type="radio"/>                     | <input type="radio"/>                      |



|               |     |     |     |     |
|---------------|-----|-----|-----|-----|
| Urine marking | ( ) | ( ) | ( ) | ( ) |
|---------------|-----|-----|-----|-----|

53) Have you observed other changes in the behaviour of your cat besides those included in the previous list?

---



---



---



---

54) What general changes have you seen in your cat's behaviour since the beginning of confinement? (please select all the options that apply)\*

- ( ) I have not detected significant changes  
( ) More nervous  
( ) More stressed  
( ) More relaxed  
( ) More excitable  
( ) More calm  
( ) More attention-seeking  
( ) More demanding  
( ) More frustrated  
( ) More irritable

**Table S1** Participants' demographics and information about the household

| Age groups             | %    | Number | Median | Min-Max |
|------------------------|------|--------|--------|---------|
| 18-25                  | 4.6  | 25     |        |         |
| 26-35                  | 23.2 | 127    |        |         |
| 36-45                  | 30.7 | 168    |        |         |
| 46-55                  | 25.2 | 138    |        |         |
| 56-65                  | 13.5 | 74     |        |         |
| 66-75                  | 2.7  | 15     |        |         |
| >76                    | 0.2  | 1      |        |         |
| <b>Sex</b>             |      |        |        |         |
| Female                 | 86.1 | 472    |        |         |
| Male                   | 13.9 | 76     |        |         |
| <b>Education level</b> |      |        |        |         |
| Middleschool diploma   | 3.6  | 20     |        |         |
| High school diploma    | 35.6 | 195    |        |         |
| Degree                 | 39.4 | 216    |        |         |
| Post-graduate degree   | 20.6 | 113    |        |         |
| Other                  | 0.7  | 4      |        |         |
| <b>Employment</b>      |      |        |        |         |
| Employee               | 27.7 | 152    |        |         |
| Freelance              | 17.9 | 98     |        |         |

|                                                           |      |       |
|-----------------------------------------------------------|------|-------|
| Student                                                   | 4.9  | 7     |
| Labourer                                                  | 4.2  | 23    |
| Retired                                                   | 4.4  | 24    |
| Stay-at-home                                              | 4.6  | 25    |
| I work with animals<br>(veterinarian,<br>dog trainer etc) | 18.4 | 101   |
| Other                                                     | 17.9 | 98    |
| <b>Role in the family</b>                                 |      |       |
| Son/daughter                                              | 13   | 71    |
| Mother/father                                             | 33.6 | 184   |
| Adult (without children)                                  | 48.7 | 267   |
| Other                                                     | 4.7  | 26    |
| <b>Number of people that live in the house</b>            |      |       |
| Children (0-5)                                            |      | 0 0-6 |
| Children (6-12)                                           |      | 0 0-4 |
| Children (13-17)                                          |      | 0 0-4 |
| Adults (18-64)                                            |      | 2 0-5 |
| Elderly (>65)                                             |      | 0 0-4 |
| <b>Number of animals that live in the house</b>           |      |       |
| Dog                                                       |      | 0 0-6 |
| Cat                                                       |      | 2 1-6 |
| <b>Type of house</b>                                      |      |       |
| Flat                                                      | 61.5 | 337   |
| Independent house                                         | 38.5 | 211   |
| <b>Size of the house</b>                                  |      |       |
| Small                                                     | 29.7 | 163   |
| Medium to large                                           | 70.3 | 385   |
| <b>Perceived income</b>                                   |      |       |
| Low                                                       | 4    | 22    |
| Mean                                                      | 73   | 400   |
| High                                                      | 23   | 126   |
| <b>Is the house big enough?</b>                           |      |       |
| Yes                                                       | 86.1 | 472   |
| No                                                        | 13.9 | 76    |

|                                                                             |      |     |
|-----------------------------------------------------------------------------|------|-----|
| <b>Is there enough air in the house?</b>                                    |      |     |
| Yes                                                                         | 95.1 | 521 |
| No                                                                          | 4.9  | 27  |
| <b>Family situation during lockdown</b>                                     |      |     |
| We are all confined and none of us work from home                           | 18.1 | 99  |
| We are all confined and some of us work from home                           | 19   | 104 |
| We are all confined and we all work from home                               | 13.5 | 74  |
| Some of us are confined and some are allowed to go out for business reasons | 35.8 | 196 |
| We all have permission to go out for business reasons                       | 13.7 | 75  |

**Table S2:** Participants' demographics and information about the household

| <b>Age groups</b>      | <b>%</b> | <b>Number</b> | <b>Median</b> | <b>Min-Max</b> |
|------------------------|----------|---------------|---------------|----------------|
| 18-25                  | 4.6      | 25            |               |                |
| 26-35                  | 23.2     | 127           |               |                |
| 36-45                  | 30.7     | 168           |               |                |
| 46-55                  | 25.2     | 138           |               |                |
| 56-65                  | 13.5     | 74            |               |                |
| 66-75                  | 2.7      | 15            |               |                |
| >76                    | 0.2      | 1             |               |                |
| <b>Sex</b>             |          |               |               |                |
| Female                 | 86.1     | 472           |               |                |
| Male                   | 13.9     | 76            |               |                |
| <b>Education level</b> |          |               |               |                |

|                                                     |      |     |
|-----------------------------------------------------|------|-----|
| Middleschool diploma                                | 3.6  | 20  |
| High school diploma                                 | 35.6 | 195 |
| Degree                                              | 39.4 | 216 |
| Post-graduate degree                                | 20.6 | 113 |
| Other                                               | 0.7  | 4   |
| <b>Employment</b>                                   |      |     |
| Employee                                            | 27.7 | 152 |
| Freelance                                           | 17.9 | 98  |
| Student                                             | 4.9  | 7   |
| Labourer                                            | 4.2  | 23  |
| Retired                                             | 4.4  | 24  |
| Stay-at-home                                        | 4.6  | 25  |
| I work with animals (veterinarian, dog trainer etc) | 18.4 | 101 |
| Other                                               | 17.9 | 98  |
| <b>Role in the family</b>                           |      |     |
| Son/daughter                                        | 13   | 71  |
| Mother/father                                       | 33.6 | 184 |
| Adult (without children)                            | 48.7 | 267 |
| Other                                               | 4.7  | 26  |
| <b>Number of people that live in the house</b>      |      |     |
| Children (0-5)                                      | 0    | 0-6 |
| Children (6-12)                                     | 0    | 0-4 |
| Children (13-17)                                    | 0    | 0-4 |
| Adults (18-64)                                      | 2    | 0-5 |
| Elderly (>65)                                       | 0    | 0-4 |
| <b>Number of animals that live in the house</b>     |      |     |
| Dog                                                 | 0    | 0-6 |
| Cat                                                 | 2    | 1-6 |
| <b>Type of house</b>                                |      |     |
| Flat                                                | 61.5 | 337 |
| Independent house                                   | 38.5 | 211 |
| <b>Size of the house</b>                            |      |     |
| Small                                               | 29.7 | 163 |
| Medium to large                                     | 70.3 | 385 |

|                                                                             |      |     |
|-----------------------------------------------------------------------------|------|-----|
| <b>Perceived income</b>                                                     |      |     |
| Low                                                                         | 4    | 22  |
| Mean                                                                        | 73   | 400 |
| High                                                                        | 23   | 126 |
| <b>Is the house big enough?</b>                                             |      |     |
| Yes                                                                         | 86.1 | 472 |
| No                                                                          | 13.9 | 76  |
| <b>Is there enough air in the house?</b>                                    |      |     |
| Yes                                                                         | 95.1 | 521 |
| No                                                                          | 4.9  | 27  |
| <b>Family situation during lockdown</b>                                     |      |     |
| We are all confined and none of us work from home                           | 18.1 | 99  |
| We are all confined and some of us work from home                           | 19   | 104 |
| We are all confined and we all work from home                               | 13.5 | 74  |
| Some of us are confined and some are allowed to go out for business reasons | 35.8 | 196 |
| We all have permission to go out for business reasons                       | 13.7 | 75  |

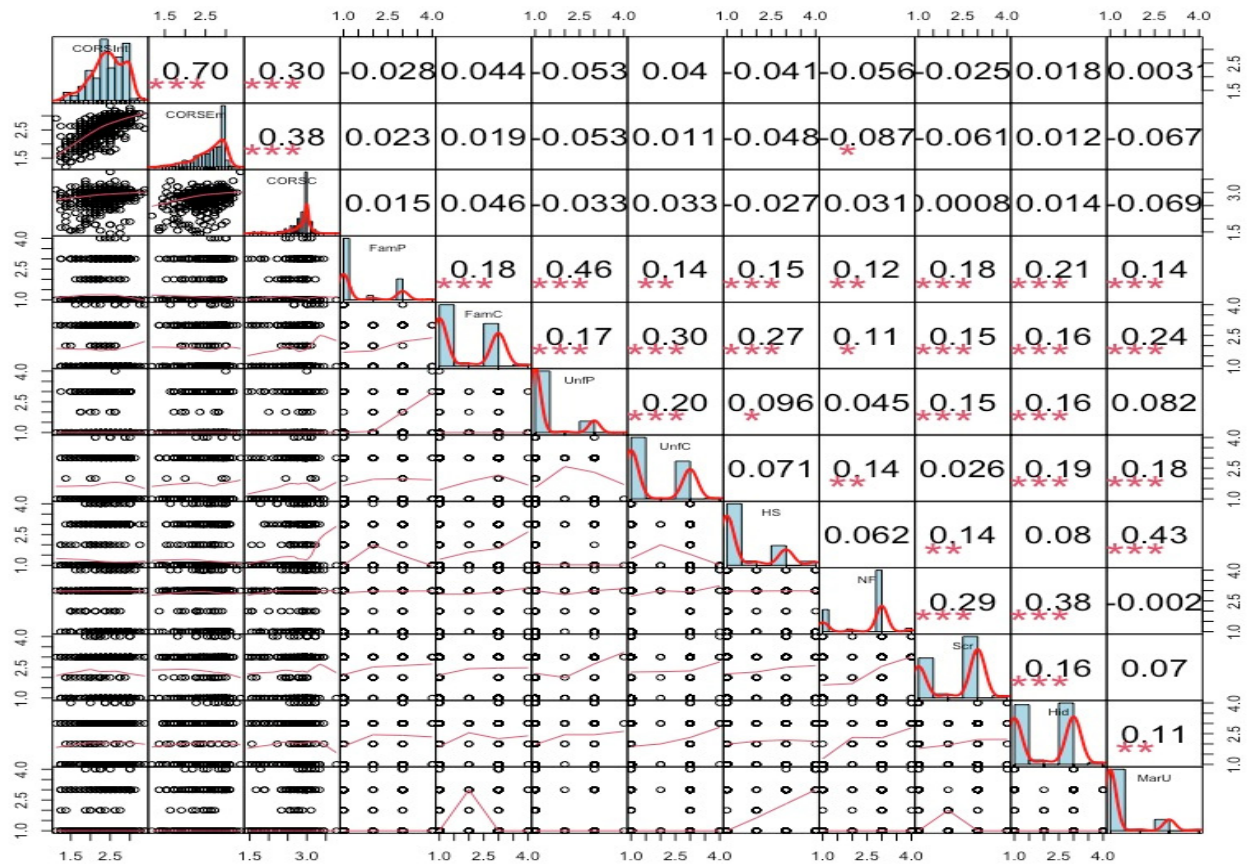

**Figure S1: Scatterplot graph of the Spearman's correlations.** The distribution of each variable is shown on the diagonal. On the bottom of the diagonal are reported the bivariate scatter plots with a fitted line are displayed. CORSEm = cat-owner interaction domain, CORSEm = emotional bond domain, CORSCost = perceived costs domain, FamP = aggression towards familiar people, FamC = aggression towards familiar cats, UnfP = aggression towards unfamiliar people, UnfC = aggression towards unfamiliar cats, HS = house soiling, NF = noise fear, Scr = scratching, Hid = hiding, MarU = marking with urine. On the top of the diagonal are reported the value of the correlation plus the significance level as asterisks. Each significance level is associated to a symbol: p-values 0 = "\*\*\*\*", 0.001 = "\*\*\*", 0.01 = "\*\*", 0.05 = ".".
